# Supplementary material for: The impact of oligosaccharide content, glycosidic linkages and lactose content of galacto-oligosaccharides (GOS) on the expression of mucus-related genes in goblet cells
Source: Royal Society of Chemistry journal article supplement (doi:10.1039/d0fo00064g), 2020-01-01
Supplement: d0fo00064g1.pdf [file d0fo00064g1.pdf]

Online supplementary Material

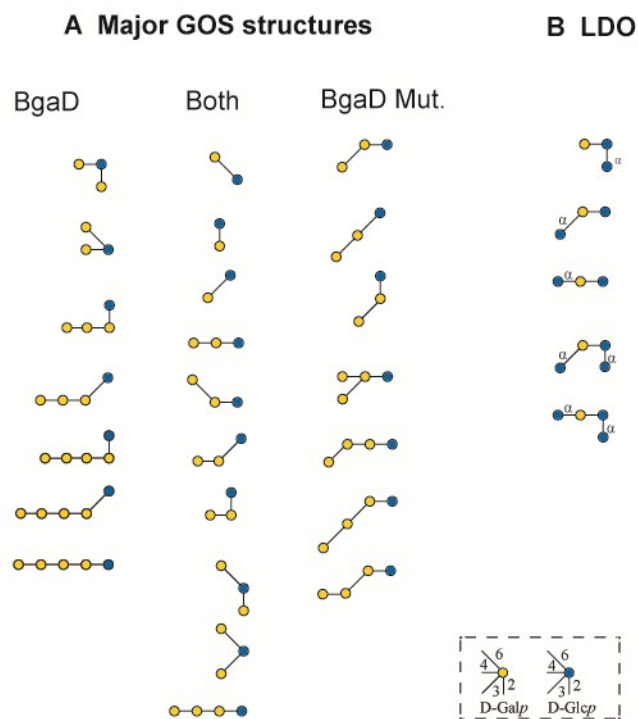

Supplemental Figure 1. Structure graphical representation. A. Major GOS structures, B. LDO. All linkages are in  $\beta$ -configuration, unless otherwise indicated.

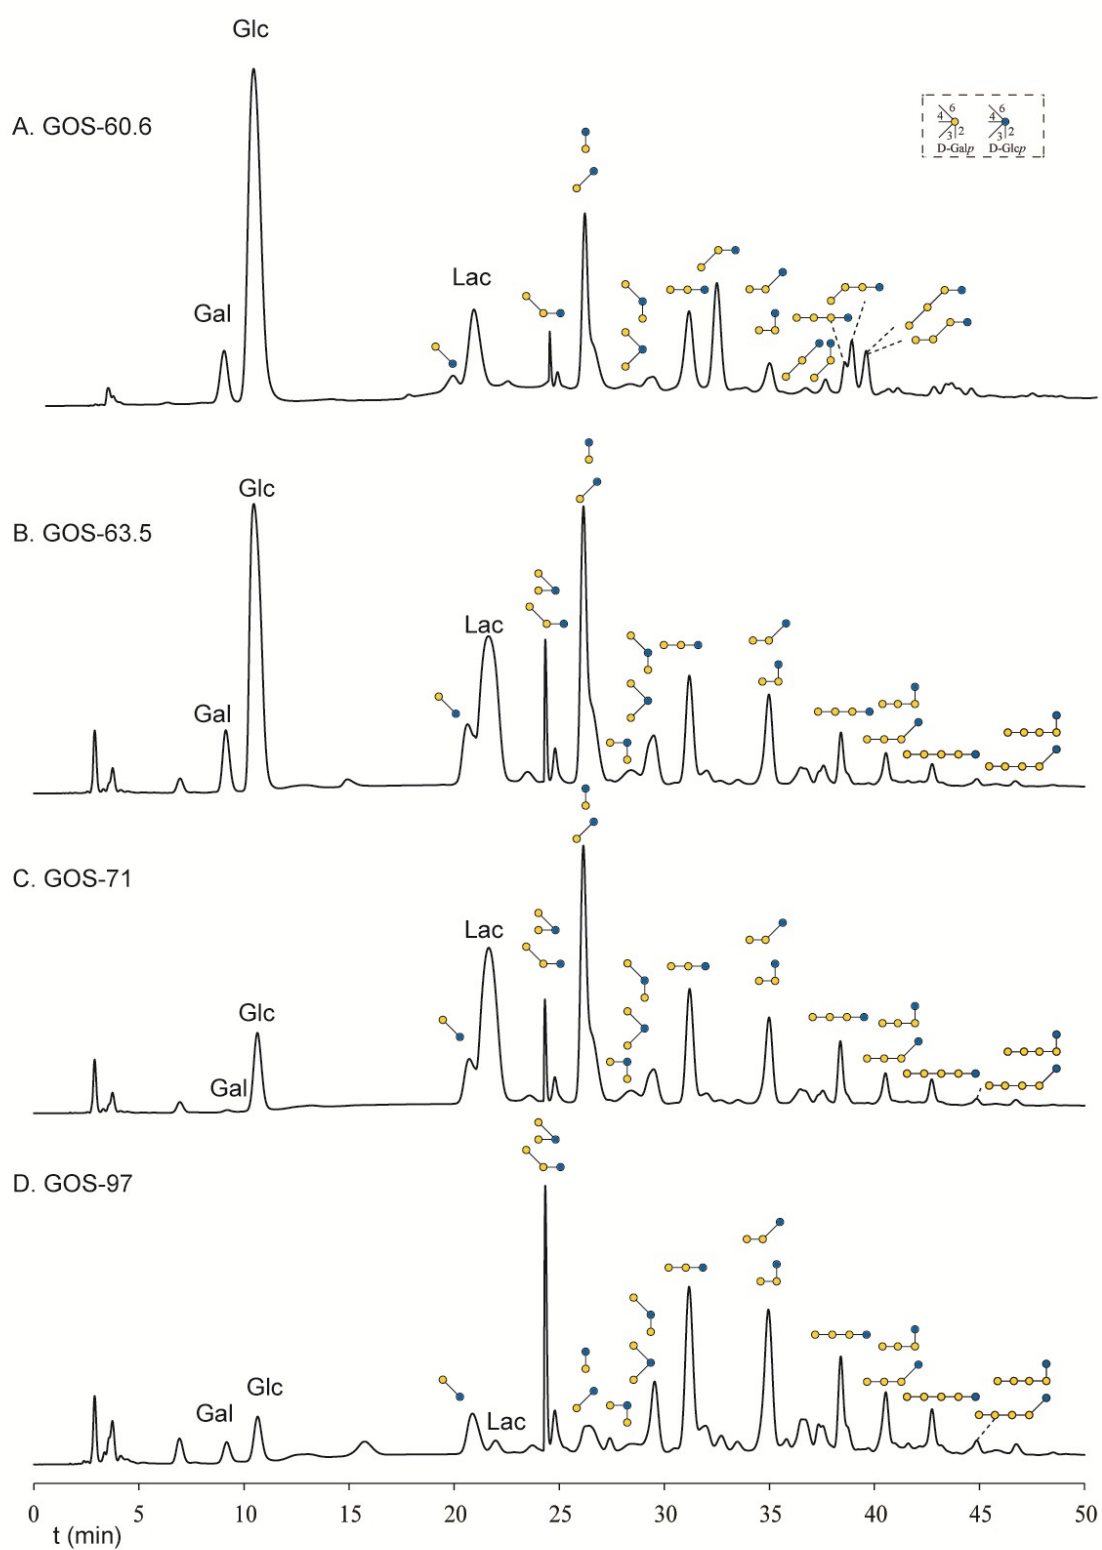

Supplemental Figure 2. HPAEC-PAD analysis of GOS samples.

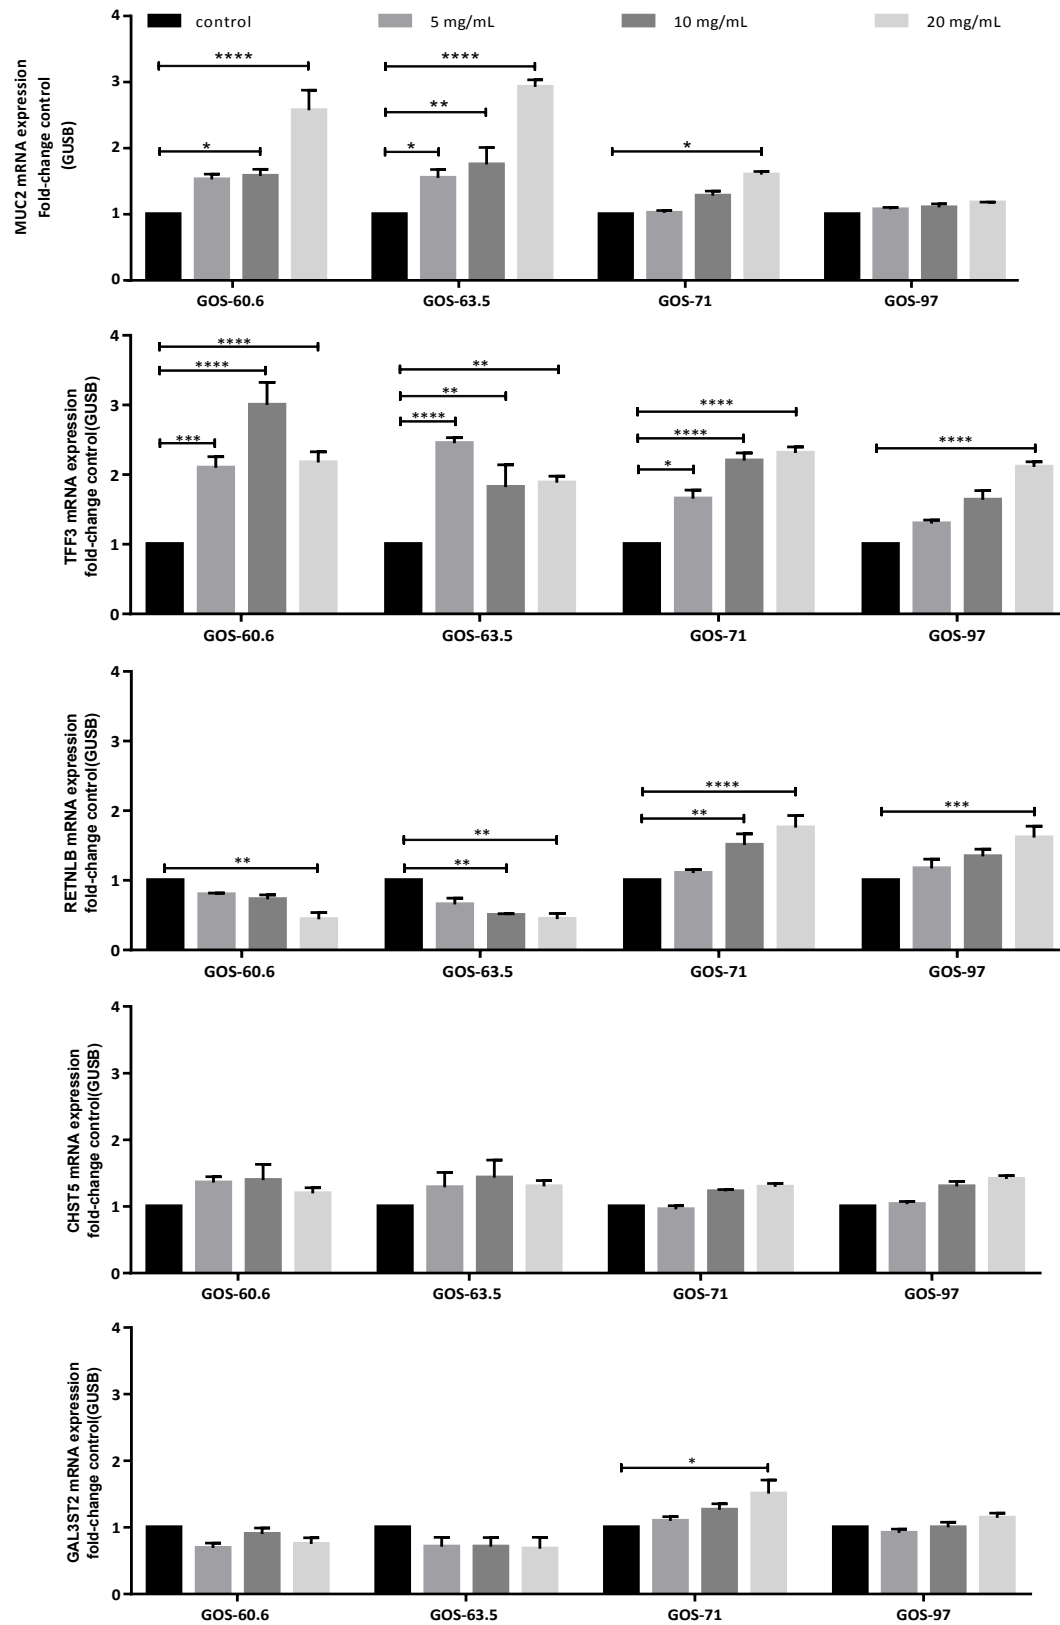

Supplemental Figure 3. LS174 cells were incubated for 48 h with GOS of variable content of transgalactosylated oligosaccharides at 5, 10 and 20 mg/mL in goblet cell. Values are expressed as means  $\pm$ SEM, n=4. The data is represented as fold-change of mRNA expression normalized to GUSB. Data were analyzed by Dunnet's post hoc test after a significant 1-way ANOVA. Values are expressed as means  $\pm$ SEM, n=4. \*Different from control  $p < 0.05$ . GOS-60.6, GOS-63.5, GOS-71, and GOS-97. MUC2, Mucin2; TFF3, Trefoil factor 3; RETNLB, Resistin-like molecule beta; CHST5, Carbohydrate (N-acetylglucosamine-6-O) sulfotransferase 5; GAL3ST2, Galactose-3-O-sulfotransferase 2.

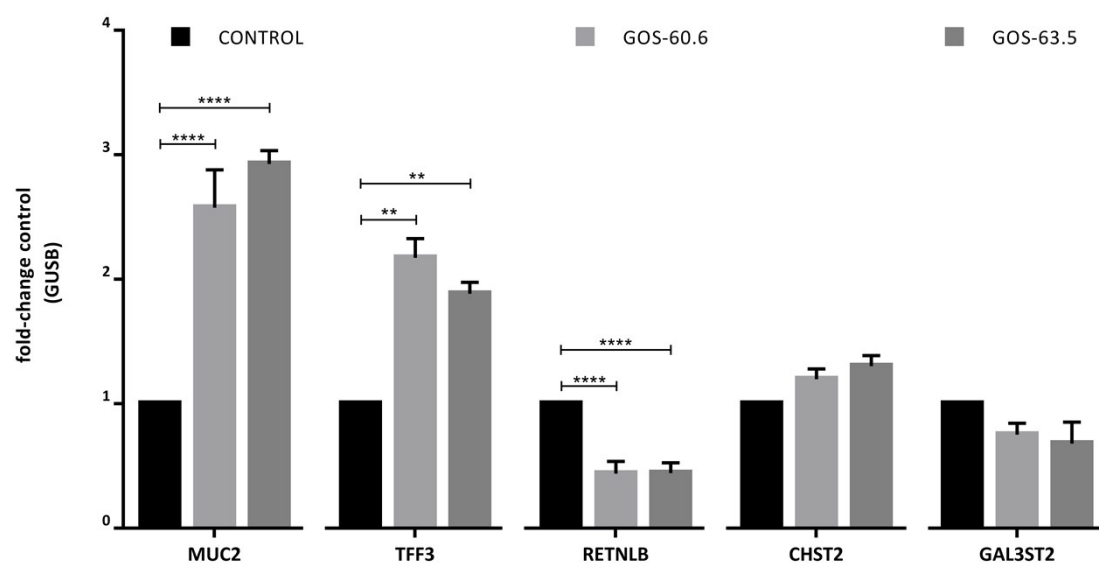

Supplemental Figure 4. Effect of ( $\beta 1 \leftrightarrow 3/4$ )GOS-60.6 and ( $\beta 1 \leftrightarrow 4$ )GOS-63.5 on the gene expression of goblet cells secretory products. Cells were treated with 20 mg/mL at 48 h. The data is represented as fold-change of mRNA expression normalized to GUSB. Data were analyzed by Dunnet's post hoc test after a significant 1-way ANOVA. Values are expressed as means  $\pm$  SEM, n=4. \*Different from control  $p < 0.05$ .

MUC2, Mucin2; TFF3, Trefoil factor 3; RETNLB, Resistin-like molecule beta; CHST5, Carbohydrate (N-acetylglucosamine-6-O) sulfotransferase 5; GAL3ST2, Galactose-3-O-sulfotransferase 2.

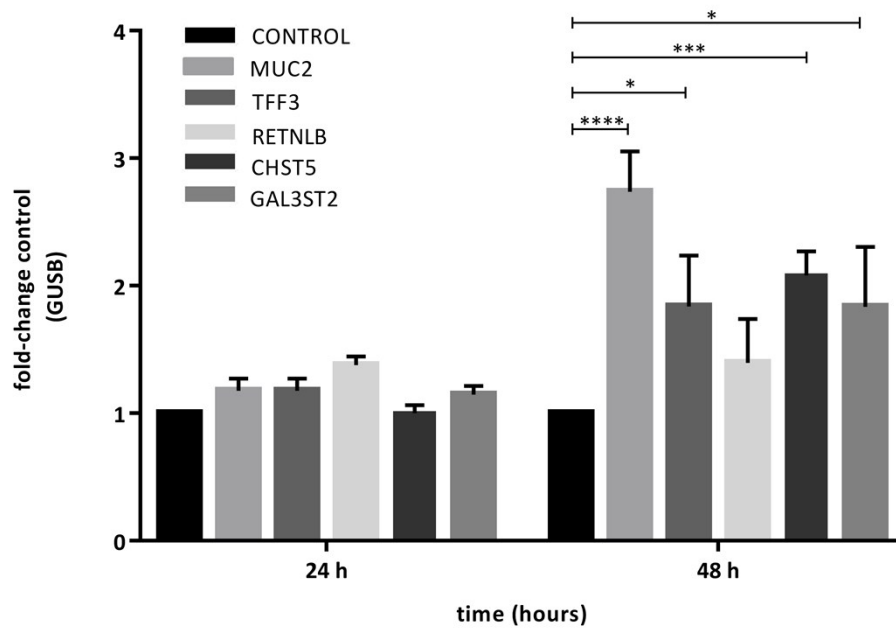

Supplemental Figure 5. Effects of LDO at 10 mg/mL on the secretory function of goblet cells after 24 and 48 h of incubation. The data is represented as fold-change of mRNA expression normalized to GUSB. Data were analyzed by Dunnet's post hoc test after a significant 1-way ANOVA. Values are expressed as means  $\pm$  SEM, n=4. \*Different from control  $p < 0.05$ . CON, control; MUC2, Mucin2; TFF3, Trefoil factor 3; RETNLB, Resistin-like molecule beta; CHST5, Carbohydrate (N-acetylglucosamine-6-O) sulfotransferase 5; GAL3ST2, Galactose-3-O-sulfotransferase 2.
